1                   **Bclaf1 critically regulates the type I interferon response and is degraded by**  
2                                           **alphaherpesvirus US3**

3

4   Chao Qin<sup>1</sup>, Rui Zhang<sup>1</sup>, Yue Lang<sup>1</sup>, Anwen Shao<sup>2</sup>, Aotian Xu<sup>1</sup>, Wenhai Feng<sup>2</sup>, Jun Han<sup>1</sup>,  
5   Mengdong Wang<sup>1</sup>, Wanwei He<sup>1</sup>, Cuilian Yu<sup>1</sup>, and Jun Tang<sup>1\*</sup>

6   <sup>1</sup>State Key Laboratory of Agrobiotechnology and College of Veterinary Medicine, China  
7   Agricultural University, Beijing 100193, China

8   <sup>2</sup>Department of Microbiology and Immunology, College of Biological Sciences, China  
9   Agricultural University, Beijing 100193, China

10   \*Correspondence: [jtang@cau.edu.cn](mailto:jtang@cau.edu.cn) (J.T.)

11

12 **Abstract**

13

14 Type I interferon response plays a prominent role against viral infection, which is frequently  
15 disrupted by viruses. Here, we report Bcl-2 associated transcription factor 1 (Bclaf1) is  
16 degraded during the alphaherpesvirus Pseudorabies virus (PRV) and Herpes simplex virus  
17 type 1 (HSV-1) infections through the viral protein US3. We further reveal that Bclaf1 functions  
18 critically in type I interferon signaling. Knockdown or knockout of Bclaf1 in cells significantly  
19 impairs interferon- $\alpha$  (IFN $\alpha$ ) -mediated gene transcription and viral inhibition against US3  
20 deficient PRV and HSV-1. Mechanistically, Bclaf1 maintains a mechanism allowing STAT1 and  
21 STAT2 to be efficiently phosphorylated in response to IFN $\alpha$ , and more importantly, facilitates  
22 IFN-stimulated gene factor 3 (ISGF3) binding with IFN-stimulated response elements (ISRE)  
23 for efficient gene transcription by directly interacting with ISRE and STAT2. Our studies  
24 establish the importance of Bclaf1 in IFN $\alpha$ -induced antiviral immunity and in the control of viral  
25 infections.

26

27 **Introduction**

28

29 Herpesviridae is a family of large DNA viruses with an ability to establish persistent infection in  
30 hosts. The viruses have evolved multiple strategies to establish persistent infection and  
31 combat host defenses; among these, the interferon (IFN) antiviral response is most prominent.  
32 Members of the family are causative agents of a variety of human and animal diseases and  
33 are further grouped into the three subfamilies, including alpha-, beta- and  
34 gammaherpesviruses (Steiner & Benninger, 2013). The alphaherpesvirus subfamily is  
35 neurotropic, including the genera simplexvirus and varicellovirus.

36 Pseudorabies virus (PRV) and herpes simplex virus type 1 (HSV-1) belong to the  
37 alphaherpesvirus subfamily and the genera varicellovirus and simplexvirus, respectively. They  
38 are often used as model viruses to study alphaherpesvirus biology. PRV is a swine pathogen  
39 that causes the economically important Aujeszky's disease (Muller, Hahn et al., 2011,  
40 Pomeranz, Reynolds et al., 2005). HSV-1 is a human restricted virus, resulting in various  
41 mucocutaneous diseases, such as herpes labialis, genital herpes, herpetic whitlow, and  
42 keratitis (Roizman & Whitley, 2013). It also causes serious encephalitis in a small portion of the  
43 infected individuals (Roizman & Whitley, 2013).

44 Viral infection is defended by hosts at multiple levels, including intrinsic, innate and adaptive  
45 immunity. The type I Interferon (IFN-I) response plays a central role in innate immunity against  
46 viral infection. IFN-I positions cells in a potent antiviral state by inducing the synthesis of  
47 hundreds of antiviral proteins encoded by IFN-stimulated genes (ISGs). This process is  
48 initiated by binding of IFN-I to its receptor subunits (IFNAR1 and IFNAR2), which leads to the  
49 activation of the Janus Kinases (JAKs), JAK1 and TYK2. Activated JAKs then phosphorylate  
50 signal transducer and activator of transcription (STAT) 1 and 2, leading to the formation of a  
51 trimeric complex, referred to as IFN-stimulated gene factor 3 (ISGF3), which is comprised of  
52 STAT1/STAT2 and IFN regulatory factor 9 (IRF9). ISGF3 translocates to the nucleus and binds  
53 to IFN-stimulated response elements (ISRE) in the DNA to initiate the transcription of ISGs  
54 (Platanias, 2005, Stark & Darnell, 2012, Wang, Xu et al., 2017). Many of the gene products  
55 have potent antiviral functions (Sadler & Williams, 2008). Viruses have, in turn, evolved

56 various strategies to antagonize the functions of IFN, which might be particularly important for  
57 herpesviruses to establish persistent infection in hosts (Garcia-Sastre, 2017, Katze, He et al.,  
58 2002, Schulz & Mossman, 2016). Key molecules in IFN signaling are targeted by various  
59 components of alphaherpesviruses. For example, PRV or HSV-1 utilize their encoded  
60 dUTPase UL50 to induce IFNAR1 degradation and inhibit type I IFN signaling in an enzymatic  
61 activity-independent manner (Zhang, Xu et al., 2017).

62 Increasing evidence indicates that IFN signaling is subject to extensive regulation and that  
63 additional coregulators are required to modulate the transcription of ISGs. For instance, the  
64 methyltransferase SETD2 promotes IFN $\alpha$ -dependent antiviral immunity via catalyzing STAT1  
65 methylation on K525 (Chen, Liu et al., 2017); RNF2 increases the K33-linked  
66 polyubiquitination of STAT1 at position K379 to promote the disassociation of STAT1/STAT2  
67 from DNA and suppress the transcription of ISGs (Liu, Jiang et al., 2018). The molecules that  
68 participate in IFN-induced transcription could be potential targets of herpesviruses. Thus,  
69 identifying novel components in IFN signaling and their interactions with viral molecules will  
70 provide a deeper understanding of IFN signaling and its interaction with viral infection.

71 US3 is a conserved Ser/Thr kinase encoded by every alphaherpesvirus identified thus far  
72 (Deruelle & Favoreel, 2011). It critically participates in the pathogenicity of viruses *in vivo* and  
73 is involved in the nuclear egress of viral capsids (Reynolds, Wills et al., 2002, Wagenaar, Pol  
74 et al., 1995). As a viral kinase, US3 expression impacts host cells in many aspects, including  
75 cytoskeletal alteration (Broeke, Radu et al., 2009, Favoreel, Minnebruggen et al., 2005, Jacob,  
76 Van den Broeke et al., 2015), the inhibition of histone deacetylase 1 and 2 (HDAC1/2) (Poon,  
77 Gu et al., 2006, Walters, Kinchington et al., 2010), and, more notably, disruption of various  
78 host defense mechanisms. US3 prevents host cells from apoptosis (Benetti & Roizman, 2007,  
79 Chang, Lin et al., 2013, Leopardi, Sant et al., 1997), disrupts the antiviral subnuclear  
80 structures promyelocytic leukemia nuclear bodies (PML-NBs) (Jung, Finnen et al., 2011),  
81 down-regulates major histocompatibility complex (MHC) class I surface expression (Rao,  
82 Pham et al., 2011), and interferes with the IFN response (Liang & Roizman, 2008, Piroozmand,  
83 Koyama et al., 2004, Wang, Ni et al., 2014, Wang, Wang et al., 2013).

84 Bclaf1 (Bcl-2 associated transcription factor 1; also called Btf for Bcl-2 associated  
85 transcription factor) was initially identified in a yeast two-hybrid system as a binding protein for  
86 adenovirus E1B 19K protein (Kasof, Goyal et al., 1999). It contains homology to the basic  
87 zipper (bZip) and Myb domains and binds DNA *in vitro* (Kasof et al., 1999). Bclaf1-knockout  
88 mice are embryonic lethal due to defects in lung development (McPherson, Sarras et al., 2009).  
89 Bclaf1 participates in diverse biological processes, including apoptosis (Kasof et al., 1999),  
90 autophagy (Lamy, Ngo et al., 2013), DNA damage response (Lee, Yu et al., 2012, Savage,  
91 Gorski et al., 2014), senescence (Shao, Sun et al., 2016), cancer progression (Dell'Aversana,  
92 Giorgio et al., 2017, Zhou, Li et al., 2014) and T cell activation (Kong, Kim et al., 2011).  
93 Recently, a role for Bclaf1 in herpesviral defense is emerging, and more strikingly, Bclaf1 is  
94 targeted by multiple viral components. The betaherpesvirus human cytomegalovirus (HCMV)  
95 dispatches both viral proteins (pp71 and UL35) and a microRNA to diminish cellular Bclaf1  
96 levels (Lee, Kalejta et al., 2012). Bclaf1 is also identified as a target of several latently  
97 expressed microRNAs of the gammaherpesviruse Kaposi's sarcoma-associated herpesvirus  
98 (KSHV) (Ziegelbauer, Sullivan et al., 2009). The fact that multiple mechanisms have been  
99 utilized by the members of beta- and gammaherpesviruses to suppress the expression of

100 Bclaf1 indicates that this protein has a very important antiviral function. However, whether  
101 Bclaf1 is also involved in alphaherpesvirus infection and the molecular mechanism of its  
102 antiviral function are not known.

103 In this study, we examined the role of Bclaf1 in alphaherpesvirus infection and found that  
104 Bclaf1 is also degraded during PRV and HSV-1 infection through US3. More importantly, we  
105 revealed Bclaf1 as a critical regulator in the IFN-induced antiviral response. On the one hand,  
106 Bclaf1 maintains a mechanism that allows STAT1/STAT2 to be efficiently phosphorylated in  
107 response to IFN; on the other hand, it interacts with ISGF3 complex in the nucleus mainly  
108 through STAT2 and facilitates their interactions with the promoters of ISGs. These results  
109 reveal a critical role for Bclaf1 in IFN signaling and a strategy employed by alphaherpesvirus to  
110 disable it.

111

## 112 **Results**

113

### 114 **PRV and HSV-1 dispatch US3 to degrade Bclaf1 in a proteasome-dependent manner**

115

116 To examine the effect of alphaherpesvirus infection on Bclaf1, we infected porcine cells with  
117 PRV and human cells with HSV-1. We observed a dramatic decrease in Bclaf1 levels in all the  
118 cells examined at the time points when substantial viral proteins were expressed, including  
119 porcine kidney PK15 (Figure 1A), swine testis (ST) (Figure S1A) cells and human HEp-2  
120 (Figure 1B) cells. Bclaf1 reduction appeared to occur more rapidly during HSV-1 infection.  
121 Since Bclaf1 is degraded in the proteasome upon HCMV infection, we examined if this was the  
122 case for PRV and HSV-1. We treated the cells with the proteasome inhibitor MG132 for 8 h at  
123 1 h after viral adsorption. Compared with the control, the MG132 treatment blocked PRV and  
124 HSV-1 infection induced down-regulation of Bclaf1 and had minimal effect on viral protein  
125 expression (Figure 1C and 1D). These results suggest that both PRV and HSV-1 infection  
126 trigger a targeted and proteasome-dependent degradation of Bclaf1.

127 To determine the viral protein responsible for the Bclaf1 degradation, we utilized a panel of  
128 gene deletion PRVs, particularly EP0, US3 and UL50 deleted strains, since these viral proteins  
129 are involved in the degradation of various proteins (Boutell & Everett, 2013, Jung et al., 2011,  
130 Zhang et al., 2017). Infecting cells with WT and the gene deletion PRVs showed that only the  
131 PRV  $\Delta$ US3 strain lost the ability to degrade Bclaf1 (Figure 1E). Indeed, although the Bclaf1  
132 levels in the cells infected with PRV WT decreased over time up to 24 h post infection, those in  
133 the PRV  $\Delta$ US3 infected cells remained unchanged in the PK15 cells (Figure 1F) and even  
134 increased in the ST cells (Figure S1B, S1C and S1D). Similarly, the deletion of US3 from  
135 HSV-1 also abolished its ability to decrease Bclaf1 in the HEp-2 cells (Figure 1G). Collectively,  
136 these data indicate that US3 is essential for PRV- and HSV-1-induced Bclaf1 down-regulation.  
137 It also suggests that certain cells may respond to PRV and HSV-1 infection by increasing  
138 Bclaf1, which is concealed by US3 mediated Bclaf1 down-regulation.

139 To determine if US3 alone is sufficient to induce Bclaf1 degradation, we ectopically expressed  
140 PRV or HSV-1 US3 in HEK293T cells. The expression of US3 but not the empty vector or  
141 UL50 markedly reduced endogenous Bclaf1 (Figure S1E), which was rescued by MG132  
142 treatment (Figure 1H). These results suggest that US3 induces the proteasomal degradation  
143 of Bclaf1.

144

### 145 **Bclaf1 promotes the IFN $\alpha$ -mediated inhibition of PRV/HSV-1 replication**

146

147 The degradation of Bclaf1 upon PRV/HSV-1 infection by US3 suggests that Bclaf1 may  
148 possess an important antiviral function, which is inhibited by US3 but should be in action  
149 against US3 deficient viruses. Thus, to determine the role of Bclaf1 in viral infection, we  
150 focused on the differential properties between WT and  $\Delta$ US3 PRV infected cells. Although one  
151 well-known function of US3 is antiapoptosis, and Bclaf1 has been shown to be involved in it,  
152 we observed a similar level of apoptosis induced by  $\Delta$ US3 PRV infection in the Bclaf1  
153 knockdown and control cells (Figure S2).

154 The dramatic difference we observed between the WT and  $\Delta$ US3 PRV/HSV1 was that the  
155 latter was more susceptible to interferon. The deletion of US3 in PRV/HSV-1 significantly  
156 decreased viral productions in PK15 (PRV) and HEp-2 (HSV-1) cells treated with IFN $\alpha$ , while  
157 having no or a slight influence on viral growth in the absence of interferon treatment (Figure 2A  
158 and 2B). As expected, Bclaf1 was not degraded in  $\Delta$ US3 PRV/HSV-1 infected cells. To  
159 determine whether Bclaf1 was involved in interferon mediated viral suppression, we depleted  
160 Bclaf1 using siRNAs in PK15 and HEp-2 cells or utilized a Bclaf1 knockout HeLa cell line and  
161 then infected the cells with  $\Delta$ US3 PRV/HSV-1 treated with or without IFN $\alpha$ . Compared with  
162 their respective controls, the expression of viral proteins and viral productions in Bclaf1  
163 knockdown or knockout cells was significantly increased when treated with IFN $\alpha$  (Figure 2C,  
164 2D and 2E). Altogether, our data supports that Bclaf1 enhances the IFN $\alpha$ -induced antiviral  
165 function against  $\Delta$ US3 PRV/HSV-1 infection.

166

### 167 **Bclaf1 is required for IFN $\alpha$ -induced ISG expression**

168

169 We then examined the effect of Bclaf1 depletion on IFN $\alpha$ -induced gene transcription. Using an  
170 ISRE luciferase reporter assay, real time PCR and Western analysis, we showed that the  
171 IFN $\alpha$ -induced luciferase activity and upregulation of mRNAs and proteins of the examined  
172 ISGs were all much lower in HeLa Bclaf1-KO cells than those in control HeLa cells (Figure 3A,  
173 3B and 3C). Knockdown of Bclaf1 in HEp-2 cells (Figure 3D) or in PK15 cells (Figure S3) using  
174 siRNAs also reduced IFN $\alpha$ -induced transcription. The deficiency of ISG induction in Bclaf1-KO  
175 HeLa cells after IFN $\alpha$  treatment was partially restored by the overexpression Bclaf1 (Figure  
176 3E). Collectively, these data suggest that Bclaf1 enhances IFN $\alpha$ -induced transcription.

177

### 178 **Bclaf1 facilitates the phosphorylation of STAT1/STAT2**

179

180 To understand the exact role of Bclaf1 in the IFN signaling, we analyzed the signaling events  
181 that might be impaired in Bclaf1-deficient cells. We observed reduced courses of  
182 phosphorylation for STAT1 and STAT2 in response to IFN $\alpha$  in Bclaf1-KO HeLa cells (Figure 4A)  
183 and Bclaf1-silenced HEp-2 cells (Figure 4B) compared with relative control cells. Fractionation  
184 experiments demonstrated that the IFN $\alpha$ -induced nuclear translocation of STAT1/STAT2 in the  
185 Bclaf1-knockdown cells was reduced accordingly (Figure 4C). Thus, the loss of Bclaf1 impairs  
186 the IFN $\alpha$ -induced phosphorylation of STAT1/STAT2.

187 Because the majority of Bclaf1 localized in the nucleus, the mechanism for Bclaf1 to influence

188 this step is likely indirect, possibly through altering the expression levels of the components  
189 essential for STAT1/STAT2 phosphorylation. However, no obvious difference in the major  
190 components, including Receptor, JAK1, TYK2, STAT1 and STAT2, between the Bclaf1  
191 knockdown or knockout cells and the WT controls was observed (Figure S4).

192

### 193 **Bclaf1 binds with ISRE and promotes the association of ISGF3 with DNA**

194

195 In addition, our Chromatin Immunoprecipitation (ChIP) assays showed that IFN $\alpha$ -induced  
196 binding of STAT1/STAT2 to the promoters of ISGs was also greatly decreased in Bclaf1-KO  
197 HeLa cells (Figure 5A) and Bclaf1-silenced HEp-2 cells (Figure S5) compared with that in  
198 relative control cells.

199 Because Bclaf1 predominantly localized in the nucleus, we reasoned that Bclaf1 should exert  
200 its function in the nucleus and that the reduced STAT1/STAT2 phosphorylation by IFN $\alpha$  upon  
201 Bclaf1 reduction could be an indirect consequence. Therefore, we focused on the aspect that  
202 Bclaf1 may enhance the binding of ISGF3 to the promoters. To exclude the possibility that the  
203 impaired binding between STAT1/STAT2 to the ISGs promoters in the Bclaf1-knockdown cells  
204 was due to the reduced nuclear STAT1/STAT2 in these cells, we performed a DNA pull-down  
205 assay to directly measure whether STAT1/STAT2/IRF9 binding to the promoters was  
206 enhanced by Bclaf1. An ISRE DNA was synthesized, biotin-labeled, and added into equal  
207 amounts of purified STAT1/STAT2/IRF9 as well as increased concentrations of purified Bclaf1  
208 followed by a streptavidin-bead pull-down. The addition of Bclaf1 drastically increased the  
209 binding of STAT1/STAT2/IRF9 to Bio-ISRE in a dose-dependent manner, and Bclaf1 was  
210 present in the Bio-ISRE pull-down complex (Figure 5B). Purified Bclaf1 was pulled down by  
211 Bio-ISRE but not by Bio-GFP (Figure 5C), suggesting that Bclaf1 was directly bound to ISRE  
212 specifically. The ChIP assay confirmed that Bclaf1 was bound to the promoter regions of ISGs  
213 in HeLa cells (Figure 5D), which appeared to be constitutive and was not induced by IFN $\alpha$   
214 treatment. To further characterize the DNA sequence required for binding with Bclaf1, we  
215 replaced entire ISRE consensus sequence (Mut1) or the core sequence of 5'-TTCNNTTT-3'  
216 (Au-Yeung, Mandhana et al., 2013) (Mut2) with a sequence from GFP. We also mutated the  
217 TTT motif near the 3' end of the ISRE by changing TTT to TAT (Mut3). DNA pull-down assays  
218 demonstrated that Mut1 and Mut2 failed to interact with Bclaf1, whereas Mut3 still could  
219 (Figure 5E), indicating Bclaf1 binds with the core sequence of ISRE and the TTT motif is not  
220 required. In aggregate, these data demonstrated that Bclaf1 bound with ISRE specifically and  
221 promoted the association of ISGF3 with DNA.

222

### 223 **Bclaf1 associates with ISGF3**

224

225 To understand the molecular mechanism by which Bclaf1 facilitates ISGF3 binding to ISGs  
226 promoters, we performed co-IP assays to examine the interaction between Bclaf1 and ISGF3,  
227 which is composed of STAT1, STAT2 and IRF9. We constructed a HEp-2 cell line that  
228 endogenously expresses Flag-Bclaf1 by adding a *Flag* to the *Bclaf1* gene using the  
229 CRISPR/Cas9 technique and is referred as HEp-2-Flag-Bclaf1. Fractionation of the cells  
230 followed by co-IPs using a Flag-antibody showed that Flag-Bclaf1 interacted with STAT1,  
231 STAT2 and IRF9 in the nucleus where it mainly localized (Figure 6A and 6B). Reversely,

232 endogenous Bclaf1 was also detected in the immuno-complexes of STAT1, STAT2 or IRF9  
233 after IPs of nuclear extracts of HeLa cells using their respective antibodies (Figure S6). The  
234 interaction between Bclaf1 and STAT1/STAT2/IRF9 occurred in the absence of IFN $\alpha$  treatment  
235 and was increased after IFN $\alpha$  treatment, correlating with more STAT1/STAT2/IRF9 being  
236 translocated into the nucleus (Figure 6A, 6B and Figure S6). We further determined the  
237 regions in Bclaf1 that mediated its association with STAT1, STAT2 or IRF9 by co-expressing  
238 various Flag tagged Bclaf1 fragments with Ha tagged STAT1, STAT2 or IRF9 in HEK293T cells  
239 and performing co-IPs, and identified the region 236-620 responsible for binding to these  
240 proteins (Figure 6C). To examine whether the interaction between Bclaf1 and  
241 STAT1/STAT2/IRF9 is required for its ability to enhance IFN $\alpha$  transcription, we overexpressed  
242 Bclaf1 full-length and the indicated fragments in HEp-2 followed by IFN $\alpha$  treatment. mRNA  
243 measurements showed that the IFN $\alpha$ -induced *IFIT1* transcription was enhanced by full-length  
244 Bclaf1 and Bclaf1-F2 (236-620), and not by the fragments that failed to bind with  
245 STAT1/STAT2/IRF9 (Figure 6D). Taken together, these results suggest that Bclaf1 interacts  
246 with ISGF3 complex in the nucleus, which is important for Bclaf1 to enhance the activation of  
247 ISRE after IFN $\alpha$  stimulation.

248

#### 249 **Bclaf1 associates with ISGF3 complex primarily through interacting with STAT2**

250

251 Next, we set out to determine how Bclaf1 interacts with ISGF3. We first examined the direct  
252 interactions between Bclaf1 and the components of ISGF3 by mixing bacterially purified  
253 His-STAT1, -STAT2 or -IRF9 with GST-Bclaf1 F2 followed by GST pull-down assays. Western  
254 analysis showed that only His-STAT2 was able to be pulled down specifically by GST-Bclaf1  
255 F2, whereas the other two were not (Figure 7A and data not shown). These results hinted that  
256 STAT2 is the crucial component connecting ISGF3 to Bclaf1. In supporting this, co-IP assays  
257 showed that the interaction between Bclaf1 and STAT1 or IRF9 was enhanced by STAT2, and  
258 not by IRF9 or STAT1 upon overexpression in 293T cells (Figure 7B and 7C). Moreover, the  
259 interaction between Bclaf1 and STAT1 or IRF9 at endogenous levels was decreased upon  
260 STAT2 knockdown in HEp-2-Flag-Bclaf1 cells treated with IFN $\alpha$  (Figure 7D). In addition, *in*  
261 *vitro* DNA pulldown assays demonstrated that in the absence of STAT2 Bclaf1 lost its ability to  
262 recruit the components of ISGF3 to ISRE (Figure 7E). Collectively, these data indicate that  
263 STAT2 is the key component mediating the binding of Bclaf1 to ISGF3 complex.

264

#### 265 **Discussion**

266

267 The IFN response is critical in the control of viral infection and is often evaded or antagonized  
268 by various viruses. Most identified strategies used by viruses to evade ISG expression  
269 emphasize on the known signaling molecules in the IFN pathway targeted by various viral  
270 components. Here, we revealed a novel positive regulator, Bclaf1, in IFN signaling and its  
271 degradation by the viral protein US3 during alphaherpesvirus PRV and HSV-1 infection.

272 The evidence supporting Bclaf1 as a critical regulator in IFN-mediated antiviral response  
273 includes the following: 1) IFN $\alpha$ -induced ISG transcription is greatly compromised in Bclaf1  
274 knockdown or knockout cells; 2) Bclaf1 is required for the efficient phosphorylation of STAT1  
275 and STAT2 induced by IFN $\alpha$ ; 3) Bclaf1 binds with ISRE and facilitates the binding of ISGF3

276 complex to promoters of the ISGs; 4) Bclaf1 interacts with ISGF3 through STAT2; 5) Bclaf1 is  
277 degraded by US3 during PRV and HSV-1 infection; and 6) In the absence of US3, PRV and  
278 HSV-1 become more sensitive to IFN $\alpha$  treatment, which is partly due to the unreduced level of  
279 Bclaf1 in the cells. These findings establish Bclaf1 as a critical positive regulator in IFN  
280 signaling and indicate its importance in host innate immunity against herpesvirus infection,  
281 which may be more broadly against other viruses as well.

282 We demonstrated that Bclaf1 was involved in two critical steps in IFN signaling, including the  
283 efficient phosphorylation of STAT1 and STAT2 and binding of the transcriptional complex to  
284 ISGs promoters (Figure 8). At present, the mechanism by which Bclaf1 regulates  
285 STAT1/STAT2 phosphorylation is unknown. STAT1/STAT2 phosphorylation is catalyzed by  
286 JAK1 and TYK2 activated by IFN-induced receptor dimerization, which occurs rapidly in the  
287 membrane. The mechanism for Bclaf1 to influence this step is likely indirect as Bclaf1 primarily  
288 localized in the nucleus. Emerging evidence indicates that the modification states of these  
289 components, prior to IFN engagement, also affect STAT1 and STAT2 phosphorylation by JAKs  
290 (Begitt, Droscher et al., 2011, Chen et al., 2017, Ginter, Bier et al., 2012, Liu et al., 2018,  
291 Steen, Nogusa et al., 2013, Wang, Nan et al., 2017). For instance, Chen et al showed that  
292 methyltransferase SETD2-mediated methylation of STAT1 significantly enhanced STAT1  
293 phosphorylation by JAK1 (Chen et al., 2017). The result that the lack of Bclaf1 decreases  
294 STAT1/STAT2 phosphorylation without affecting the expression of upstream components  
295 suggests that Bclaf1 may be involved in pre-existing modifications of STAT1/STAT2 by  
296 regulating relevant enzymes.

297 Although the JAK-STAT pathway is well established, the regulation of the  
298 STAT1/STAT2/IRF9-mediated transcription of ISGs in the nucleus is not fully understood. We  
299 demonstrated that Bclaf1 is an important positive regulator in this process. Although epigenetic  
300 modifications and chromatin-remodeling, in the context of the promoter region, are important  
301 avenues for the regulation of transcription (Bonasio, Tu et al., 2010, Venkatesh & Workman,  
302 2015), Bclaf1 appears to function by enhancing the recruitment of ISGF3 complex to the  
303 promoter of the ISGs by simultaneously binding to the promoter of the ISGs and this complex.  
304 Bclaf1 constitutively bound to the promoter of the ISGs without being enhanced by IFN $\alpha$ . It  
305 also interacted with ISGF3 in the nucleus, which was not regulated by IFN $\alpha$ -induced  
306 STAT1/STAT2 phosphorylation. However, as more and more STAT1/STAT2/IRF9 entered the  
307 nucleus following the IFN $\alpha$  treatment, more STAT1/STAT2/IRF9 was found to bind to Bclaf1  
308 and the promoter of the ISGs as well. Thus, one conceivable role of Bclaf1 in ISGF3 mediated  
309 transcription is acting as a mediator attracting ISGF3 to its prebound ISGs promoters for  
310 efficient transcription. A similar mode of action is also observed in Bclaf1-regulated C/EBP $\beta$   
311 transcription (Shao et al., 2016). Bclaf1 has a DNA-binding ability (Kasof et al., 1999), and we  
312 found that the binding between Bclaf1 and the promoter of the ISGs was likely to be a direct  
313 event. It would be interesting to further elucidate how Bclaf1 interacts with the promoter of the  
314 ISGs.

315 US3 is a potent alphaherpesviral kinase involved in antagonizing a wide range of host  
316 antiviral mechanisms. Here, we uncovered a strategy for US3 to impair IFN-mediated antiviral  
317 activity, which is to degrade Bclaf1. Bclaf1 was degraded by both genera of alphaherpesviruses  
318 and was also inhibited by members of beta- and gammaherpesviruses, indicating that the  
319 disruption of Bclaf1 might be a general mechanism for all herpesvirus infections. Since a key



320 feature of herpesviruses is the establishment of a persistent infection and reactivation upon  
321 stress, Bclaf1 may participate in these processes. To establish persistent infection,  
322 herpesviruses employ multiple strategies to counteract the antiviral activity of IFN (Paladino &  
323 Mossman, 2009, Su, Zhan et al., 2016), and the disruption of Bclaf1 might be an integral part  
324 of sabotaging IFN signaling by herpesviruses. In addition, Bclaf1 possesses other antiviral  
325 functions, such as restriction of HCMV replication and inhibition of KSHV reactivation. Others  
326 and our studies have highlighted an important role of Bclaf1 against herpesviruses infection,  
327 and it may be broadly for other viruses as well. Thus, evaluating Bclaf1's antiviral function *in*  
328 *vivo* is highly desirable. Because Bclaf1 knockout leads to embryonic lethality in mice, a  
329 conditional knockout mouse should be created.

330

## 331 **Materials and Methods**

332

### 333 **Reagents**

334

335 MG132 was purchased from APEX BIO (133407-82-6). Streptavidin beads (3419) were  
336 purchased from Cell Signaling Technology. Flag M2 beads (A2220) and 3xFlag peptide (F4799)  
337 were purchased from Sigma. Human IFN $\alpha$  was purchased from PEPROTECH (300-02AA).  
338 Glutathione agarose was purchased from GE Healthcare (17-0756-01). Porcine IFN $\alpha$  was  
339 described previously (Zhang et al., 2017). Biotin 3' End DNA Labeling Kit was purchased  
340 from Thermo Scientific (89818).

341 The following antibodies were used for co-Immunoprecipitation (co-IP): anti-Bclaf1 (1:100,  
342 sc-135845, Santa Cruz), anti-Flag (1:200, F1804, Sigma), anti-STAT1 (1:100, 14995, Cell  
343 Signaling Technology), anti-STAT2 (1:50, 72604, Cell Signaling Technology), and anti-IRF9  
344 (1:50, 76684, Cell Signaling Technology). The following antibodies were used for Chromatin  
345 Immunoprecipitation (ChIP): anti-Bclaf1 (1:50, sc-135845, Santa Cruz), anti-STAT1 (1:50,  
346 14995, Cell Signaling Technology) and anti-STAT2 (1:50, 72604, Cell Signaling Technology).  
347 The following antibodies were used for immunoblot analysis: anti-Bclaf1 (1:500, sc-135845,  
348 Santa Cruz), anti-Flag (1:2000, F1804, Sigma), anti- $\alpha$ -Tubulin (1:8000, PM054, MBL), anti-HA  
349 (1:1000, sc-805, Santa Cruz), anti-GFP (1:1000, sc-9996, Santa Cruz), anti-ISG15 (1:500,  
350 sc-166755, Santa Cruz), anti-PKR (1:1000, 12297, Cell Signaling Technology), anti-STAT1  
351 (1:1000, 14995, Cell Signaling Technology), anti-STAT2 (1:1000, 72604, Cell Signaling  
352 Technology), anti-P-STAT1 (Tyr701) (1:1000, 9167, Cell Signaling Technology), anti-P-STAT2  
353 (Tyr690) (1:1000, 88410, Cell Signaling Technology), anti-IRF9 (1:1000, 76684, Cell Signaling  
354 Technology), anti-JAK1 (1:500, 3344, Cell Signaling Technology), anti-TYK2 (1:1000, 14193,  
355 Cell Signaling Technology), anti-Histone H3 (1:2000, 17168-1-AP, Proteintech), and  
356 anti-caspase3 p17 (1:1000, sc-166589, Santa Cruz). The antibodies against PRV TK, PRV  
357 US3, PRV EP0, PRV UL50, and HSV-1 VP5 were described previously (Han, Chadha et al.,  
358 2012, Xu, Qin et al., 2015, Zhang et al., 2017). Mouse polyclonal antibodies against PRV  
359 UL42 and HSV-1 US3 were raised in mice individually with the N-terminal region of each  
360 protein as antigens.

361

### 362 **Cell and viruses**

363

364 HEK293T cells (human embryonic kidney, ATCC #CRL-3216), HeLa cells (ATCC #CCL-2),  
365 HEp-2 cells (a kind gift from Dr. Xiaojia Wang which was described previously (Wang,  
366 Patenode et al., 2011)), PK15 cells (ATCC #CCL-33), ST cells (swine testis, ATCC  
367 #CRL-1746), and Vero cells (ATCC #CCL-81) were cultured in medium supplemented with 10%  
368 (v/v) FBS at 37°C and 5% CO<sub>2</sub>. The PRV Bartha-K61, recombinant PRV UL50-knockout virus  
369 (PRV  $\Delta$ UL50), PRV EP0-knockout virus (PRV  $\Delta$ EP0) and KOS strain of HSV-1 were described  
370 previously (Han et al., 2012, Xu et al., 2015). The recombinant PRV US3-knockout virus (PRV  
371  $\Delta$ US3) and the HSV-1 US3-knockout virus (HSV-1  $\Delta$ US3) were generated in this paper (see  
372 below).

373

#### 374 **Plasmids**

375

376 The PRV US3 gene was amplified from the Bartha-K61 genome, and the HSV-1 US3 gene  
377 was amplified from the KOS genome. Both PRV and HSV-1 US3 were cloned into the pRK5  
378 vector with an N-terminal Flag tag. pRK5-Flag-PRV UL50, pRK5-Flag-HSV-1 UL50 and  
379 pRK5-Flag-Bclaf1 were previously described (Shao et al., 2016, Zhang et al., 2017). Bclaf1  
380 truncations were amplified by PCR from pRK5-Flag-Bclaf1 and were cloned into the pRK5  
381 vector with an N-terminal Flag vector. pRK5-Ha-STAT1/STAT2/IRF9 were constructed by  
382 amplifying STAT1/STAT2/IRF9 ORFs by PCR from cDNA synthesized from the total RNA of  
383 IFN $\alpha$ -stimulated HeLa cells and cloning it into the pRK5 vector with an N-terminal Ha tag  
384 vector.

385

#### 386 **Real-Time PCR**

387

388 Total RNA was extracted using TRIzol (Invitrogen) following the manufacturer's protocol. A  
389 total of 0.8  $\mu$ g total RNA from different treatments was reverse transcribed using M-MLV  
390 reverse transcriptase (Promega ) with an oligo(dT) 18 primer. Real-time PCR was performed  
391 using an UltraSYBR Mixture (Beijing CoWin Biotech, Beijing, China) and a ViiA 7 real-time  
392 PCR system (Applied Biosystems). Sample data were normalized to GAPDH expression.  
393 Specific primers used for RT-PCR assays are listed in Supplementary Table 1.

394

#### 395 **Immunoprecipitation and Western Blot**

396

397 Cells were harvested and lysed in lysis buffer (50 mM Tris-Cl at pH 8.0, 150 mM NaCl, 1%  
398 Triton X-100, 1 mM DTT, 1x complete protease inhibitor cocktail tablet and 10% glycerol). The  
399 nuclear and cytoplasmic extracts from cells were prepared using a Nuclear and Cytoplasmic  
400 Protein Extraction Kit (Beyotime Biotechnology, Shanghai, China) following the manufacturer's  
401 instructions. Equalized extracts were used for the immunoprecipitation and immunoblot  
402 analysis, which were described previously (Cui, Li et al., 2014).

403

#### 404 **Luciferase Assay**

405

406 Bclaf1-KO HeLa cells or control HeLa cells were seeded in 24-well plates and were then  
407 transfected with 100 ng of ISRE-luciferase reporter plasmids plus 20 ng of pRL-TK plasmids

408 as an internal control. After 24 h of incubation, the cells were stimulated with PBS or IFN $\alpha$ , and  
409 whole-cell lysates were collected to measure the luciferase activity with a dual luciferase  
410 reporter assay kit (Promega).

411

#### 412 **Virus Infection and Plaque Assay**

413

414 PRV or HSV-1 were propagated and tittered in Vero cells. To infect, the cells were incubated  
415 with PRV or HSV-1 for 1 h, washed with PBS, and incubated in DMEM supplemented with 5%  
416 FBS until the times indicated. For the MG132 (ApexBio) treatment, a final concentration 20 $\mu$ M  
417 of MG132 was added into culture medium at 1 h post infection to allow efficient viral entry.

418 The Viral yield was determined by titering in the Vero cells. Briefly, infected cell supernatants  
419 were cleared of cell debris by centrifugation. The Vero cells were infected in duplicate or  
420 triplicate with serial dilutions of supernatants for 1 h in serum free DMEM, washed with PBS,  
421 overlaid with 1 $\times$  DMEM/1% agarose, and incubated at 37 $^{\circ}$ C until plaque formation was  
422 observed (72 h-96 h). The cells were stained with 0.5% neutral red for 4 h-6 h at 37 $^{\circ}$ C, and the  
423 plaques were counted.

424

#### 425 **Generation of Recombinant PRV or HSV-1**

426

427 PRV  $\Delta$ US3 was generated according to methods described previously (Xu et al., 2015). Briefly,  
428 PK15 cells were cotransfected with the viral genome and the CRISPR/Cas9 system containing  
429 two targeting sgRNAs for US3. After PRV-mediated CPE was prominently observed, the  
430 supernatants were collected, and the plaque assay was performed for subcloning the viruses.  
431 Single colonies were determined via sequencing and a Western blot with PRV US3 antibodies.

432 For generation of HSV-1  $\Delta$ US3, HEK293T cells were transfected using the CRISPR/Cas9  
433 system containing the targeting sgRNA for US3, and 24 h later, the cells were infected with  
434 HSV-1 (KOS) at an MOI of 1. Viruses in the supernatants were collected at 48 h post infection  
435 and was subcloned via plaque assays. Single colonies were determined via sequencing and a  
436 Western blot with HSV-1 US3 antibodies.

437 Oligonucleotides used in this study are listed in Supplementary Table 1.

438

#### 439 **Generation of Bclaf1-KO Cells**

440

441 HeLa cells were seeded into a 6-well dish to achieve 70% confluency and were transfected  
442 with CRISPR/Cas9 plasmids containing a target sequence complimentary to the fourth exon of  
443 Bclaf1, and 48 h later, the cells were diluted and seeded into a 96-well dish at 0.5 cell/well in  
444 complete DMEM media. Wells that contained a single colony were expanded until enough  
445 cells were available for total protein extraction and determining Bclaf1 via a Western blot.

446 Oligonucleotides used in this study are listed in Supplementary Table 1.

447

#### 448 **Generation of a HEp-2 cell line that endogenously expresses Flag-Bclaf1**

449

450 To add a Flag tag to the endogenous Bclaf1, HEp-2 cells were seeded into a 6-well dish to  
451 achieve 70% confluency and were transfected with CRISPR/Cas9 plasmids containing a

452 target sequence complimentary to the intron that was prior to the ATG of Bclaf1 plus a donor  
453 plasmid containing homologous arms and Puro-P2A-3xFlag sequences. After 48 h, medium  
454 containing 2.5 mg/ml puromycin was added to select for tagged cells, and 48 h later, the cells  
455 were diluted and seeded into a 96-well dish at 0.5 cell/well in complete DMEM media. Wells  
456 that contained a single colony were expanded until enough cells were available for total protein  
457 extraction and determining Flag-Bclaf1 via a Western blot.

458 Oligonucleotides used in this study are listed in Supplementary Table 1.

459

#### 460 **RNA Interference**

461

462 siRNAs against Bclaf1 (1# 5'-GGTTCACCTTCGTATCAGAA-3') and (2#  
463 5'-TTCTCAGAATAGTCCAATT-3') and STAT2 (5'-CCCAGUUGGCUGAGAUGAUCUUUAA-3') were  
464 transfected using Lipofectamine RNAiMax (Invitrogen) at a final concentration of 20 nM  
465 following the manufacturer's instructions.

466

#### 467 **Chromatin Immunoprecipitation (ChIP)**

468

469 The ChIP assay was performed using a ChIP-IT Express enzymatic system (Active Motif,  
470 Carlsbad, CA, USA) following the manufacturer's instructions. Briefly, cells were crosslinked  
471 with 1% formaldehyde and neutralized with 0.125 M glycine. Purified chromatin was digested  
472 to ~ 500 bp by enzymatic shearing. Anti-Bclaf1, anti-STAT1, anti-STAT2 or control IgG  
473 antibodies were used for immunoprecipitation. After reverse crosslinking, the DNA samples  
474 were analyzed by PCR followed by 3% agarose gel electrophoresis. Specific primers used are  
475 listed in Supplementary Table 1.

476

#### 477 **DNA Pulldown assay**

478

479 Flag-STAT1, Flag-STAT2, Flag-IRF9 and Flag-Bclaf1 were purified from overexpressed  
480 HEK293T cells stimulated with (STAT1/STAT2/IRF9) or without (Bclaf1) IFN $\alpha$  by  
481 immunoprecipitation using M2 beads (Sigma). The biotinylated ISRE  
482 (5'-GAGACTCAGTAGTTTCACTTTCCATCGTCCAGT-3') DNA oligos were synthesized by a  
483 Biotin 3' End DNA Labeling Kit (Thermo Scientific) and were then annealed and incubated with  
484 the purified indicated Flag-tagged proteins for 30 min in binding buffer (10 mM Tris, 1 mM KCl,  
485 1%NP-40, 1 mM EDTA, 5% glycerol) at room temperature. Then, streptavidin beads (Cell  
486 Signaling) were added for incubation at 4°C for 1 h. After three washes with binding buffer, the  
487 ISRE-binding proteins were eluted by boiling and analyzed by immunoblotting.

488

#### 489 **GST Pulldown**

490

491 Purified His-STAT1/STAT2/IRF9 protein was incubated with GST-tagged Bclaf1 truncated  
492 proteins or GST control protein in PBS buffer with glutathione agarose (GE Healthcare) for 1 h  
493 at 4 °C. The incubated proteins were then washed and immunoblotted using anti-His or GST  
494 antibodies.

495

496 **Statistical analysis**

497

498 Statistical analyses were performed using GraphPad Prism software to perform Student's t  
499 test or analysis of variance (ANOVA) on at least three independent replicates. P values of  
500 <0.05 were considered statistically significant for each test.

501

502

503 **Acknowledgements**

504 We thank Drs. Huiqiang Lou (China Agricultural University), Jue Liu (Beijing Academy of  
505 Agriculture and Forestry Sciences), and Xiaojia Wang (China Agricultural University) for  
506 regents and cells. This work was supported by the National Key Research and Development  
507 Program of China (grant 2016YFD0500100), the National Natural Science Foundation of  
508 China (grant 31500703), and the State Key Laboratory of Agrobiotechnology (grant  
509 2018SKLAB1-6).

510

511 **Author contributions**

512 C.Q. and J.T. designed experiments; C.Q., R.Z., Y.L., A.S., A.X., M.W., W.H., and C.Y.  
513 performed experiments; W.F., and J.H. provided critical reagents and scientific insight; C.Q.,  
514 R.Z., and J.T. analyzed data; C.Q. and J.T. wrote the manuscript.

515

516 **Competing interests**

517 The authors declare no competing interests.

518

519 **References**

520

521 Au-Yeung N, Mandhana R, Horvath CM (2013) Transcriptional regulation by STAT1 and STAT2 in the  
522 interferon JAK-STAT pathway. *JAKSTAT* 2: e23931

523 Begitt A, Droscher M, Knobloch KP, Vinkemeier U (2011) SUMO conjugation of STAT1 protects cells  
524 from hyperresponsiveness to IFN $\gamma$ . *Blood* 118: 1002-7

525 Benetti L, Roizman B (2007) In transduced cells, the US3 protein kinase of herpes simplex virus 1  
526 precludes activation and induction of apoptosis by transfected procaspase 3. *J Virol* 81: 10242-8

527 Bonasio R, Tu S, Reinberg D (2010) Molecular signals of epigenetic states. *Science* 330: 612-616

528 Boutell C, Everett RD (2013) Regulation of alphaherpesvirus infections by the ICP0 family of proteins. *J*  
529 *Gen Virol* 94: 465-81

530 Broeke CVD, Radu M, Deruelle M, Nauwynck H, Hofmann C, Jaffer ZM, Chernoff J, Favoreel HW, Spear  
531 PG (2009) Alphaherpesvirus US3-Mediated Reorganization of the Actin Cytoskeleton Is Mediated by  
532 Group a P21-Activated Kinases. *Proceedings of the National Academy of Sciences of the United States*  
533 *of America* 106: 8707

534 Chang CD, Lin PY, Liao MH, Chang CI, Hsu JL, Yu FL, Wu HY, Shih WL (2013) Suppression of apoptosis by  
535 pseudorabies virus Us3 protein kinase through the activation of PI3-K/Akt and NF-kappaB pathways.  
536 *Res Vet Sci* 95: 764-74

537 Chen K, Liu J, Liu S, Xia M, Zhang X, Han D, Jiang Y, Wang C, Cao X (2017) Methyltransferase  
538 SETD2-Mediated Methylation of STAT1 Is Critical for Interferon Antiviral Activity. *Cell* 170: 492-506 e14

539 Cui D, Li L, Lou H, Sun H, Ngai SM, Shao G, Tang J (2014) The ribosomal protein S26 regulates p53

540 activity in response to DNA damage. *Oncogene* 33: 2225-35

541 Dell'Aversana C, Giorgio C, D'Amato L, Lania G, Matarese F, Saeed S, Di Costanzo A, Belsito Petrizzi V,  
542 Ingenito C, Martens JHA, Pallavicini I, Minucci S, Carissimo A, Stunnenberg HG, Altucci L (2017)  
543 miR-194-5p/BCLAF1 deregulation in AML tumorigenesis. *Leukemia* 31: 2315-2325

544 Deruelle MJ, Favoreel HW (2011) Keep it in the subfamily: the conserved alphaherpesvirus US3 protein  
545 kinase. *J Gen Virol* 92: 18-30

546 Favoreel HW, Minnebruggen GV, Adriaensen D, Nauwynck HJ, Spear PG (2005) Cytoskeletal  
547 Rearrangements and Cell Extensions Induced by the US3 Kinase of an Alphaherpesvirus Are Associated  
548 with Enhanced Spread. *Proceedings of the National Academy of Sciences of the United States of*  
549 *America* 102: 8990

550 Garcia-Sastre A (2017) Ten Strategies of Interferon Evasion by Viruses. *Cell Host Microbe* 22: 176-184

551 Ginter T, Bier C, Knauer SK, Sughra K, Hildebrand D, Munz T, Liebe T, Heller R, Henke A, Stauber RH,  
552 Reichardt W, Schmid JA, Kubatzky KF, Heinzel T, Kramer OH (2012) Histone deacetylase inhibitors block  
553 IFN $\gamma$ -induced STAT1 phosphorylation. *Cell Signal* 24: 1453-60

554 Han J, Chadha P, Starkey JL, Wills JW (2012) Function of glycoprotein E of herpes simplex virus requires  
555 coordinated assembly of three tegument proteins on its cytoplasmic tail. *Proceedings of the National*  
556 *Academy of Sciences of the United States of America* 109: 19798

557 Jacob T, Van den Broeke C, Grauwet K, Baert K, Claessen C, De Pelsmaeker S, Van Waesberghe C,  
558 Favoreel HW (2015) Pseudorabies virus US3 leads to filamentous actin disassembly and contributes to  
559 viral genome delivery to the nucleus. *Vet Microbiol* 177: 379-85

560 Jung M, Finnen RL, Neron CE, Banfield BW (2011) The alphaherpesvirus serine/threonine kinase us3  
561 disrupts promyelocytic leukemia protein nuclear bodies. *J Virol* 85: 5301-11

562 Kasof GM, Goyal L, White E (1999) Btf, a novel death-promoting transcriptional repressor that  
563 interacts with Bcl-2-related proteins. *Molecular & Cellular Biology* 19: 4390-4404

564 Katze MG, He Y, Gale M, Jr. (2002) Viruses and interferon: a fight for supremacy. *Nat Rev Immunol* 2:  
565 675-87

566 Kong S, Kim SJ, Sandal B, Lee SM, Gao B, Zhang DD, Fang D (2011) The type III histone deacetylase  
567 Sirt1 protein suppresses p300-mediated histone H3 lysine 56 acetylation at Bclaf1 promoter to inhibit  
568 T cell activation. *J Biol Chem* 286: 16967-75

569 Lamy L, Ngo VN, Emre NC, Shaffer AL, 3rd, Yang Y, Tian E, Nair V, Kruhlak MJ, Zingone A, Landgren O,  
570 Staudt LM (2013) Control of autophagic cell death by caspase-10 in multiple myeloma. *Cancer Cell* 23:  
571 435-49

572 Lee SH, Kalejta RF, Kerry J, Semmes OJ, O'Connor CM, Khan Z, Garcia BA, Shenk T, Murphy E (2012)  
573 BCLAF1 restriction factor is neutralized by proteasomal degradation and microRNA repression during  
574 human cytomegalovirus infection. *Proc Natl Acad Sci U S A* 109: 9575-80

575 Lee YY, Yu YB, Gunawardena HP, Xie L, Chen X (2012) BCLAF1 is a radiation-induced H2AX-interacting  
576 partner involved in gammaH2AX-mediated regulation of apoptosis and DNA repair. *Cell Death Dis* 3:  
577 e359

578 Leopardi R, Sant CV, Roizman B (1997) The Herpes Simplex Virus 1 Protein Kinase US3 is Required for  
579 Protection from Apoptosis Induced by the Virus. *Proceedings of the National Academy of Sciences of*  
580 *the United States of America* 94: 7891

581 Liang L, Roizman B (2008) Expression of gamma interferon-dependent genes is blocked independently  
582 by virion host shutoff RNase and by US3 protein kinase. *J Virol* 82: 4688-96

583 Liu S, Jiang M, Wang W, Liu W, Song X, Ma Z, Zhang S, Liu L, Liu Y, Cao X (2018) Nuclear RNF2 inhibits

584 interferon function by promoting K33-linked STAT1 disassociation from DNA. *Nat Immunol* 19: 41-52  
585 McPherson JP, Sarras H, Lemmers B, Tamblyn L, Migon E, Matysiak-Zablocki E, Hakem A, Azami SA,  
586 Cardoso R, Fish J, Sanchez O, Post M, Hakem R (2009) Essential role for Bclaf1 in lung development  
587 and immune system function. *Cell Death Differ* 16: 331-9  
588 Muller T, Hahn EC, Tottewitz F, Kramer M, Klupp BG, Mettenleiter TC, Freuling C (2011) Pseudorabies  
589 virus in wild swine: a global perspective. *Arch Virol* 156: 1691-705  
590 Paladino P, Mossman KL (2009) Mechanisms employed by herpes simplex virus 1 to inhibit the  
591 interferon response. *J Interferon Cytokine Res* 29: 599-607  
592 Piroozmand A, Koyama AH, Shimada Y, Fujita M, Arakawa T, Adachi A (2004) Role of Us3 gene of  
593 herpes simplex virus type 1 for resistance to interferon. *International Journal of Molecular Medicine*  
594 14: 641-645  
595 Plataniias LC (2005) Mechanisms of type-I- and type-II-interferon-mediated signalling. *Nat Rev*  
596 *Immunol* 5: 375-86  
597 Pomeranz LE, Reynolds AE, Hengartner CJ (2005) Molecular biology of pseudorabies virus: impact on  
598 neurovirology and veterinary medicine. *Microbiol Mol Biol Rev* 69: 462-500  
599 Poon AP, Gu H, Roizman B (2006) ICP0 and the US3 protein kinase of herpes simplex virus 1  
600 independently block histone deacetylation to enable gene expression. *Proc Natl Acad Sci U S A* 103:  
601 9993-9998  
602 Rao P, Pham HT, Kulkarni A, Yang Y, Liu X, Knipe DM, Cresswell P, Yuan W (2011) Herpes simplex virus 1  
603 glycoprotein B and US3 collaborate to inhibit CD1d antigen presentation and NKT cell function. *J Virol*  
604 85: 8093-104  
605 Reynolds AE, Wills EG, Roller RJ, Ryckman BJ, Baines JD (2002) Ultrastructural Localization of the  
606 Herpes Simplex Virus Type 1 UL31, UL34, and US3 Proteins Suggests Specific Roles in Primary  
607 Envelopment and Egress of Nucleocapsids. *Journal of Virology* 76: 8939-8952  
608 Roizman B, Whitley RJ (2013) An inquiry into the molecular basis of HSV latency and reactivation.  
609 *Annu Rev Microbiol* 67: 355-74  
610 Sadler AJ, Williams BR (2008) Interferon-inducible antiviral effectors. *Nat Rev Immunol* 8: 559-68  
611 Savage KI, Gorski JJ, Barros EM, Irwin GW, Manti L, Powell AJ, Pellagatti A, Lukashchuk N, McCance DJ,  
612 McCluggage WG, Schettino G, Salto-Tellez M, Boulwood J, Richard DJ, McDade SS, Harkin DP (2014)  
613 Identification of a BRCA1-mRNA splicing complex required for efficient DNA repair and maintenance of  
614 genomic stability. *Mol Cell* 54: 445-59  
615 Schulz KS, Mossman KL (2016) Viral Evasion Strategies in Type I IFN Signaling - A Summary of Recent  
616 Developments. *Front Immunol* 7: 498  
617 Shao AW, Sun H, Geng Y, Peng Q, Wang P, Chen J, Xiong T, Cao R, Tang J (2016) Bclaf1 is an important  
618 NF-kappaB signaling transducer and C/EBPbeta regulator in DNA damage-induced senescence. *Cell*  
619 *Death Differ* 23: 865-75  
620 Stark GR, Darnell JE, Jr. (2012) The JAK-STAT pathway at twenty. *Immunity* 36: 503-14  
621 Steen HC, Nogusa S, Thapa RJ, Basagoudanavar SH, Gill AL, Merali S, Barrero CA, Balachandran S,  
622 Gamero AM (2013) Identification of STAT2 serine 287 as a novel regulatory phosphorylation site in  
623 type I interferon-induced cellular responses. *J Biol Chem* 288: 747-58  
624 Steiner I, Benninger F (2013) Update on herpes virus infections of the nervous system. *Curr Neurol*  
625 *Neurosci Rep* 13: 414  
626 Su C, Zhan G, Zheng C (2016) Evasion of host antiviral innate immunity by HSV-1, an update. *Virol J* 13:  
627 38

628 Venkatesh S, Workman JL (2015) Histone exchange, chromatin structure and the regulation of  
629 transcription. *Nat Rev Mol Cell Biol* 16: 178-89

630 Wagenaar F, Pol JM, Peeters B, Gielkens AL, De WN, Kimman TG (1995) The US3-encoded protein  
631 kinase from pseudorabies virus affects egress of virions from the nucleus. *Journal of General Virology*  
632 76 ( Pt 7): 1851-1859

633 Walters MS, Kinchington PR, Banfield BW, Silverstein S (2010) Hyperphosphorylation of histone  
634 deacetylase 2 by alphaherpesvirus US3 kinases. *J Virol* 84: 9666-76

635 Wang K, Ni L, Wang S, Zheng C (2014) Herpes simplex virus 1 protein kinase US3 hyperphosphorylates  
636 p65/RelA and dampens NF-kappaB activation. *J Virol* 88: 7941-51

637 Wang S, Wang K, Lin R, Zheng C (2013) Herpes simplex virus 1 serine/threonine kinase US3  
638 hyperphosphorylates IRF3 and inhibits beta interferon production. *J Virol* 87: 12814-27

639 Wang W, Xu L, Su J, Peppelenbosch MP, Pan Q (2017) Transcriptional Regulation of Antiviral  
640 Interferon-Stimulated Genes. *Trends Microbiol* 25: 573-584

641 Wang X, Patenode C, Roizman B (2011) US3 protein kinase of HSV-1 cycles between the cytoplasm and  
642 nucleus and interacts with programmed cell death protein 4 (PDCD4) to block apoptosis. *Proc Natl*  
643 *Acad Sci U S A* 108: 14632-6

644 Wang Y, Nan J, Willard B, Wang X, Yang J, Stark GR (2017) Negative regulation of type I IFN signaling by  
645 phosphorylation of STAT2 on T387. *EMBO J* 36: 202-212

646 Xu A, Qin C, Lang Y, Wang M, Lin M, Li C, Zhang R, Tang J (2015) A simple and rapid approach to  
647 manipulate pseudorabies virus genome by CRISPR/Cas9 system. *Biotechnology Letters* 37: 1265-1272

648 Zhang R, Xu A, Qin C, Zhang Q, Chen S, Lang Y, Wang M, Li C, Feng W, Zhang R, Jiang Z, Tang J (2017)  
649 Pseudorabies Virus dUTPase UL50 Induces Lysosomal Degradation of Type I Interferon Receptor 1 and  
650 Antagonizes the Alpha Interferon Response. *J Virol* 91

651 Zhou X, Li X, Cheng Y, Wu W, Xie Z, Xi Q, Han J, Wu G, Fang J, Feng Y (2014) BCLAF1 and its splicing  
652 regulator SRSF10 regulate the tumorigenic potential of colon cancer cells. *Nat Commun* 5: 4581

653 Ziegelbauer JM, Sullivan CS, Ganem D (2009) Tandem array-based expression screens identify host  
654 mRNA targets of virus-encoded microRNAs. *Nat Genet* 41: 130-4

655

656



657 **Figure Legends**

658 **Figure 1. PRV and HSV-1 employ US3 to decrease Bclaf1 in a proteasome-dependent**  
659 **manner.**

660 (A) IB analysis of Bclaf1, TK and US3 in PK15 cells infected with PRV (MOI=1) for the  
661 indicated hours.  $\alpha$ -Tubulin was used as loading control.

662 (B) IB analysis of Bclaf1, VP5 and US3 in HEp-2 cells infected with HSV-1 (MOI=5) for the  
663 indicated hours.

664 (C) IB analysis of Bclaf1, UL42 and US3 in PK15 cells infected with PRV (MOI=1) followed by  
665 untreated (U) or treatment with DMSO or MG132.

666 (D) IB analysis of Bclaf1, VP5 and US3 in HEp-2 cells infected with HSV-1 (MOI=5) followed  
667 by untreated (U) or treatment with DMSO or MG132.

668 (E) IB analysis of Bclaf1, UL50, EP0 and US3 in PK15 cells infected with indicated PRV strains  
669 (MOI=1) at 8 hpi.

670 (F) IB analysis of Bclaf1, TK and US3 in PK15 cells infected with PRV WT or PRV  $\Delta$ US3  
671 (MOI=1) for the indicated hours.

672 (G) IB analysis of Bclaf1, VP5 and US3 in HEp-2 cells infected with HSV-1 WT or HSV-1  $\Delta$ US3  
673 (MOI=5) for the indicated hours.

674 (H) IB analysis of endogenous Bclaf1 in HEK293T cells transfected with Flag-tagged  
675 PRV/HSV-1 US3 expression plasmids followed by treatment with DMSO or MG132.

676

677 **Figure 2. Bclaf1 contributes to the inhibition of IFN $\alpha$  to PRV and HSV-1.**

678 (A) PK15 cells were treated with PBS or porcine IFN $\alpha$  (500U/ml) for 12 hours followed infected  
679 with PRV WT or PRV  $\Delta$ US3 (MOI=0.5) for 24 hours. IB analyzed TK, UL42, US3 and Bclaf1  
680 expression and plaque assay analyzed virus titers in supernatants.

681 (B) HEp-2 cells were treated with PBS or human IFN $\alpha$  (500U/mL) for 12 hours followed  
682 infected with HSV-1 WT or HSV-1  $\Delta$ US3 (MOI=1) for 24 hours. IB analyzed VP5, US3 and  
683 Bclaf1 expression and plaque assay analyzed virus titers in supernatants.

684 (C) IB analysis of TK, UL42 and Bclaf1 in PK15 cells transfected with si-control or si-Bclaf1  
685 followed by PBS or porcine IFN $\alpha$  (500U/mL) treatment for 12h and then infected with PRV  
686  $\Delta$ US3 (MOI=1) for 24h. Plaque assay analyzed titers of virus in supernatants.

687 (D) IB analysis of VP5 and Bclaf1 in control and Bclaf1-KO HeLa cells pre-treated with PBS or  
688 human IFN $\alpha$  (500U/mL) for 12h followed by HSV-1  $\Delta$ US3 infection (MOI=5) for 24h. Plaque  
689 assay analyzed titers of virus in supernatants.

690 (E) IB analysis of VP5 and Bclaf1 in HEp-2 cells transfected with si-control or si-Bclaf1  
691 followed by PBS or human IFN $\alpha$  (500U/mL) treatment for 12h and then infected with HSV-1  
692  $\Delta$ US3 (MOI=3) for 24h. Plaque assay analyzed titers of virus in supernatants.

693 Data are shown as mean  $\pm$  SD of three independent experiments. Statistical analysis was  
694 performed by the two-way ANOVA test. \* $p$ <0.05; \*\* $p$ <0.01; \*\*\* $p$ <0.001

695

696 **Figure 3. Bclaf1 facilitates IFN $\alpha$ -induced ISG expression.**

697 (A) ISRE-luciferase assay in HeLa WT and HeLa Bclaf1-KO cells treated with human IFN $\alpha$   
698 (500U/mL) for 10h.

699 (B) qRT-PCR analysis of *ISG15*, *IFIT1*, *IFIT2* and *OAS1* mRNA levels in HeLa WT and HeLa  
700 Bclaf1-KO cells treated with human IFN $\alpha$  (500U/mL) for the indicated time.

701 (C) IB analysis of ISG15 and PKR in HeLa WT and HeLa Bclaf1-KO cells treated with human  
702 IFN $\alpha$  for 12h.

703 (D) qRT-PCR analysis of *ISG15*, *IFIT1* and *OAS1* mRNA levels in HEp-2 cells transfected with  
704 si-control or si-Bclaf1 followed by human IFN $\alpha$  (500U/mL) treatment for 4h. IB analyzed the  
705 knocking down efficiency.

706 (E) qRT-PCR analysis of *OAS1* and *IFIT1* mRNA levels in indicated HeLa cells transfected  
707 Flag-tagged EV or Bclaf1 expression plasmids followed by PBS or human IFN $\alpha$  (500U/mL)  
708 treatment for 4h. IB analyzed the expression of Bclaf1.

709 Data are shown as mean  $\pm$  SD of three independent experiments. Statistical analysis was  
710 performed by the two-way ANOVA test (A and B) and one-way ANOVA test (D and E). \*\*p<0.01;  
711 \*\*\*p<0.001

712

713 **Figure 4. Loss of Bclaf1 attenuates IFN $\alpha$ -mediated STAT1/STAT2 phosphorylation.**

714 (A) IB analysis of phosphorylated(P)-STAT1, P-STAT2, STAT1, STAT2 and Bclaf1 in HeLa WT  
715 and HeLa Bclaf1-KO cells treated with human IFN $\alpha$  (500U/mL) for the indicated time. Data  
716 were quantified and shown as the ratio of P-STAT1 to STAT1 and P-STAT2 to STAT2.

717 (B) IB analysis of P-STAT1, P-STAT2, STAT1, STAT2 and Bclaf1 in HEp-2 cells transfected  
718 with si-control or si-Bclaf1 followed by PBS or human IFN $\alpha$  (500U/mL) treatment for the  
719 indicated time. Data were quantified and shown as the ratio of P-STAT1 to STAT1 and  
720 P-STAT2 to STAT2.

721 (C) IB analysis of P-STAT1, P-STAT2, STAT1, STAT2 and Bclaf1 in cytoplasmic and nuclear  
722 extracts of HEp-2 cells transfected with si-control or si-Bclaf1 followed by PBS or human IFN $\alpha$   
723 (500U/mL) treatment for the indicated time.  $\alpha$ -Tubulin and Histone H3 were used as the  
724 cytoplasmic and nuclear controls, respectively.

725

726 **Figure 5. Bclaf1 binds with ISRE and promotes the association of ISGF3 with DNA.**

727 (A) ChIP analysis of STAT1/STAT2 DNA-binding in promoters of *IFIT1* and *IFIT2* in HeLa WT  
728 and HeLa Bclaf1-KO cells simulated with PBS or human IFN $\alpha$  (500U/mL) for 1h.

729 (B) IB analysis of Bio-ISRE pull-down STAT1, STAT2, IRF9 and Bclaf1. Unlabeled ISRE was  
730 used for control.

731 (C) IB analysis of ISRE-binding Bclaf1. Unlabeled ISRE and Bio-GFP were used for control.

732 (D) ChIP analysis of Bclaf1 DNA-binding in promoters of *ISG15*, *IFIT1* and *IFIT2* in HeLa cells  
733 simulated with PBS or human IFN $\alpha$  (500U/mL) for 1h. An amplicon located in *IFIT1* exon2 was  
734 also tested for control.

735 (E) IB analysis of WT or mutated (1-3) Bio-ISRE pull-down Bclaf1.

736

737 **Figure 6. Bclaf1 interacts with STAT1/STAT2/IRF9.**

738 (A) IB analysis of STAT1, STAT2, P-STAT1, P-STAT2 and Flag-Bclaf1 in cytoplasmic or  
739 nuclear immunoprecipitates of a HEp-2-Flag-Bclaf1 cell line treated with PBS or human IFN $\alpha$   
740 (500U/mL) for 2h. IgG was used for control immunoprecipitation.

741 (B) IB analysis of IRF9 and Flag-Bclaf1 in cytoplasmic or nuclear immunoprecipitates of a  
742 HEp-2-Flag-Bclaf1 cell line treated with PBS or human IFN $\alpha$  (500U/mL) for 4h.

743 (C) IB analysis of immunoprecipitates of HEK293T cells co-transfected with Flag-tagged  
744 Bclaf1 truncations and Ha-tagged STAT1/STAT2/IRF9 expression plasmids.

745 (D) qRT-PCR analysis of *IFIT1* mRNA levels in HEp-2 cells transfected with Flag-tagged EV,  
746 full-length Bclaf1 or its truncations expression plasmids followed by PBS or human IFN $\alpha$   
747 (500U/mL) treatment for 3h. IB analyzed the expression of Bclaf1. Data are shown as mean  $\pm$   
748 SD of three independent experiments. Statistical analysis was performed by the one-way  
749 ANOVA test. \*\*\*p<0.001

750

751 **Figure 7. Bclaf1 interacts with ISGF3 mainly through STAT2.**

752 (A) GST pull-down analysis of the interaction between His-STAT2 and GST-Bclaf1 F2.

753 (B) IB analysis of immunoprecipitates of HEK293T cells co-transfected with Flag-tagged Bclaf1,  
754 Ha-tagged STAT1 or STAT2/IRF9 expression plasmids.

755 (C) IB analysis of immunoprecipitates of HEK293T cells co-transfected with Flag-tagged  
756 Bclaf1, Ha-tagged IRF9 or STAT2/STAT1 expression plasmids.

757 (D) IB analysis of STAT1, STAT2, IRF9 and Flag-Bclaf1 in nuclear immunoprecipitates of a  
758 HEp-2-Flag-Bclaf1 cell line transfected with si-control or si-STAT2 followed by PBS or human  
759 IFN $\alpha$  (500U/mL) treatment for 3h.

760 (E) IB analysis of Bio-ISRE pull-down STAT1, STAT2, IRF9 and Bclaf1.

761

762 **Figure 8. A working model of how Bclaf1 regulates IFN response pathway**

763 Upon IFN-I binding with receptors, Bclaf1 facilitates the phosphorylation of STAT1/STAT2 in an  
764 indirect manner. Phosphorylated STAT1 and STAT2 associate with IRF9 to format a complex  
765 called ISGF3 and translocate to the nucleus. Bclaf1 is acting as a mediator attracting ISGF3 to  
766 ISGs promoters for efficient transcription. On the one hand, Bclaf1 interacts with STAT2  
767 directly to associate with ISGF3. On the other hand, Bclaf1 binds with ISRE. During PRV or  
768 HSV-1 infection, US3 is dispatched to degrade Bclaf1 to inhibit IFN signaling.

**Figure 1**

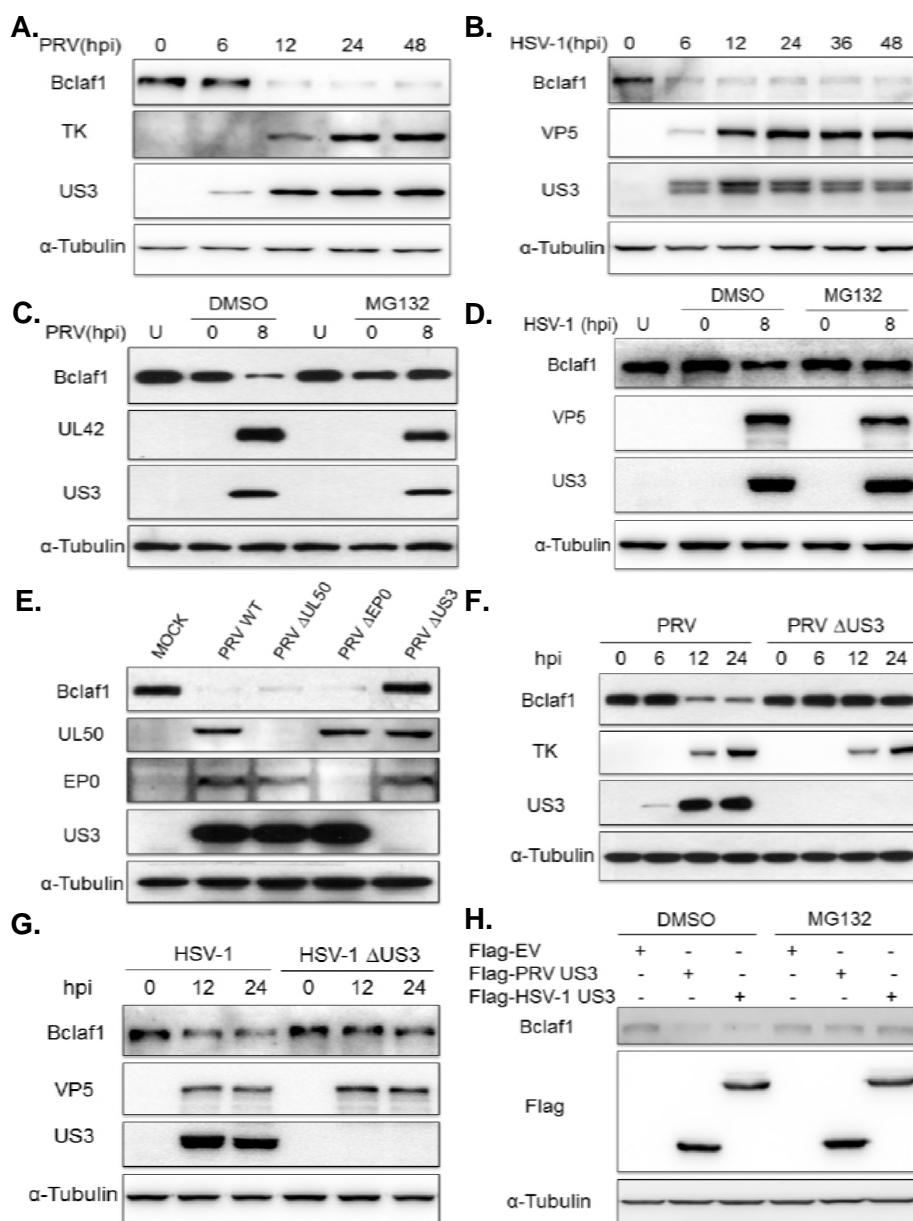

**Figure 2**

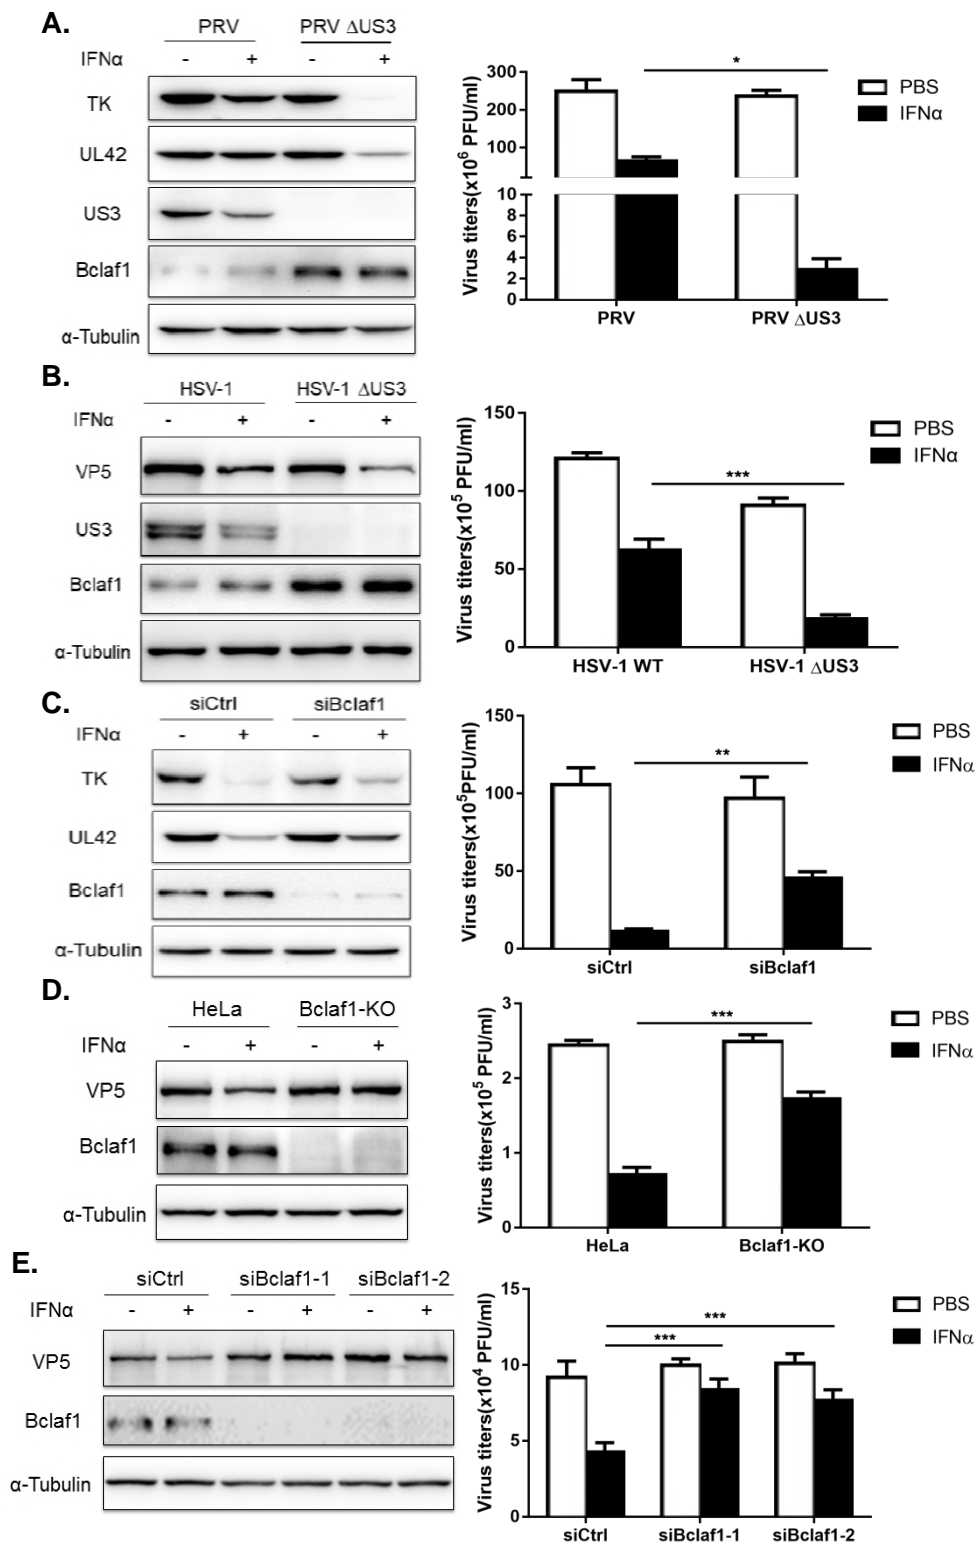

**Figure 3**

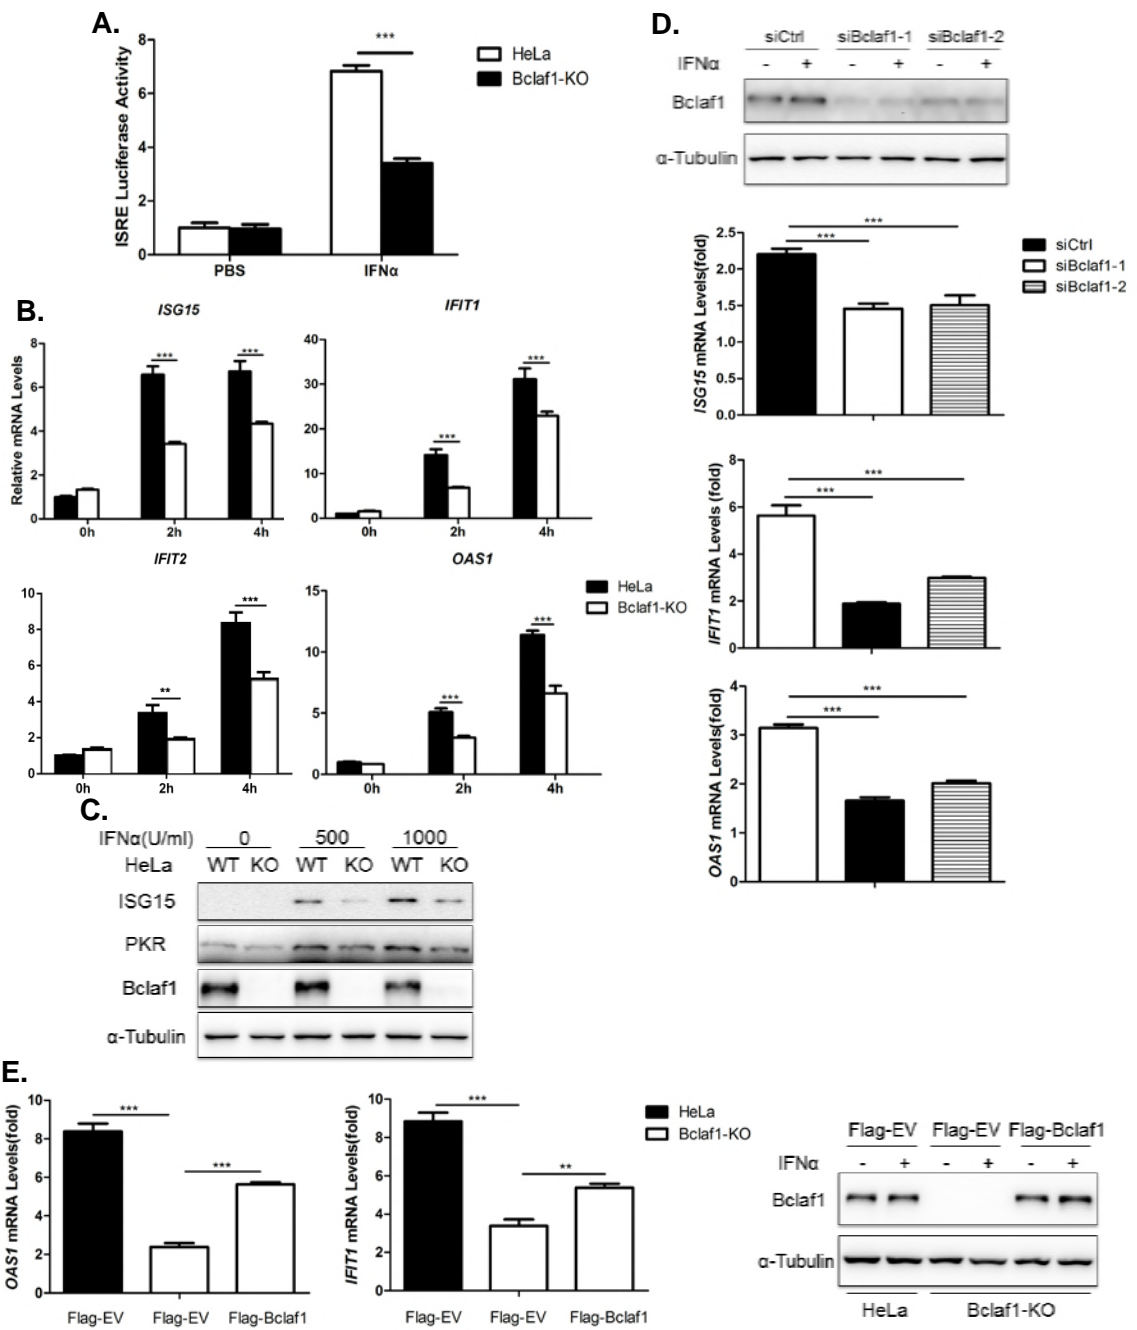

**Figure 4**

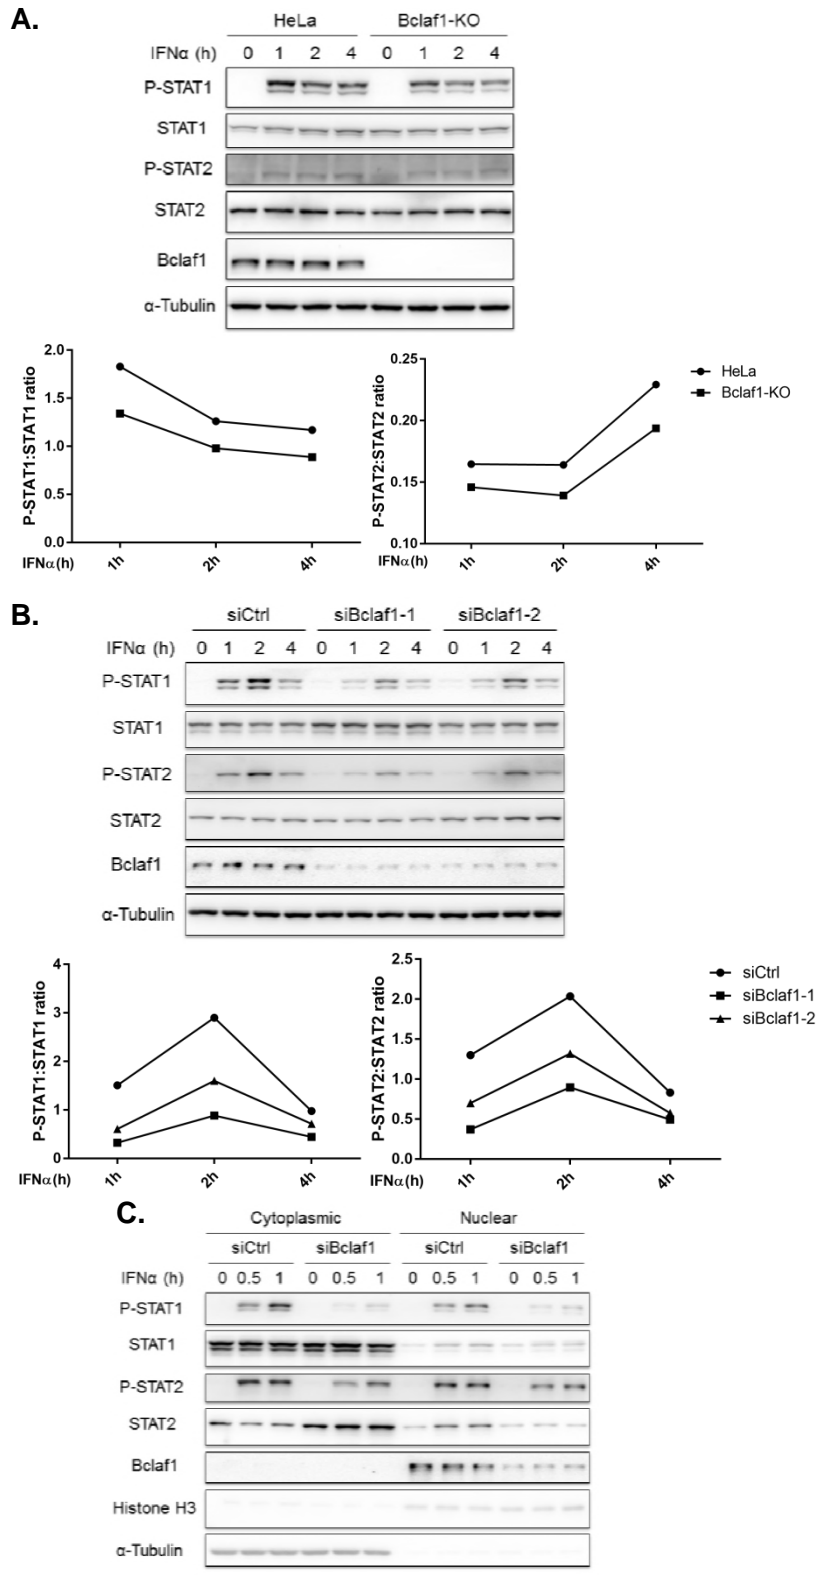

**Figure 5**

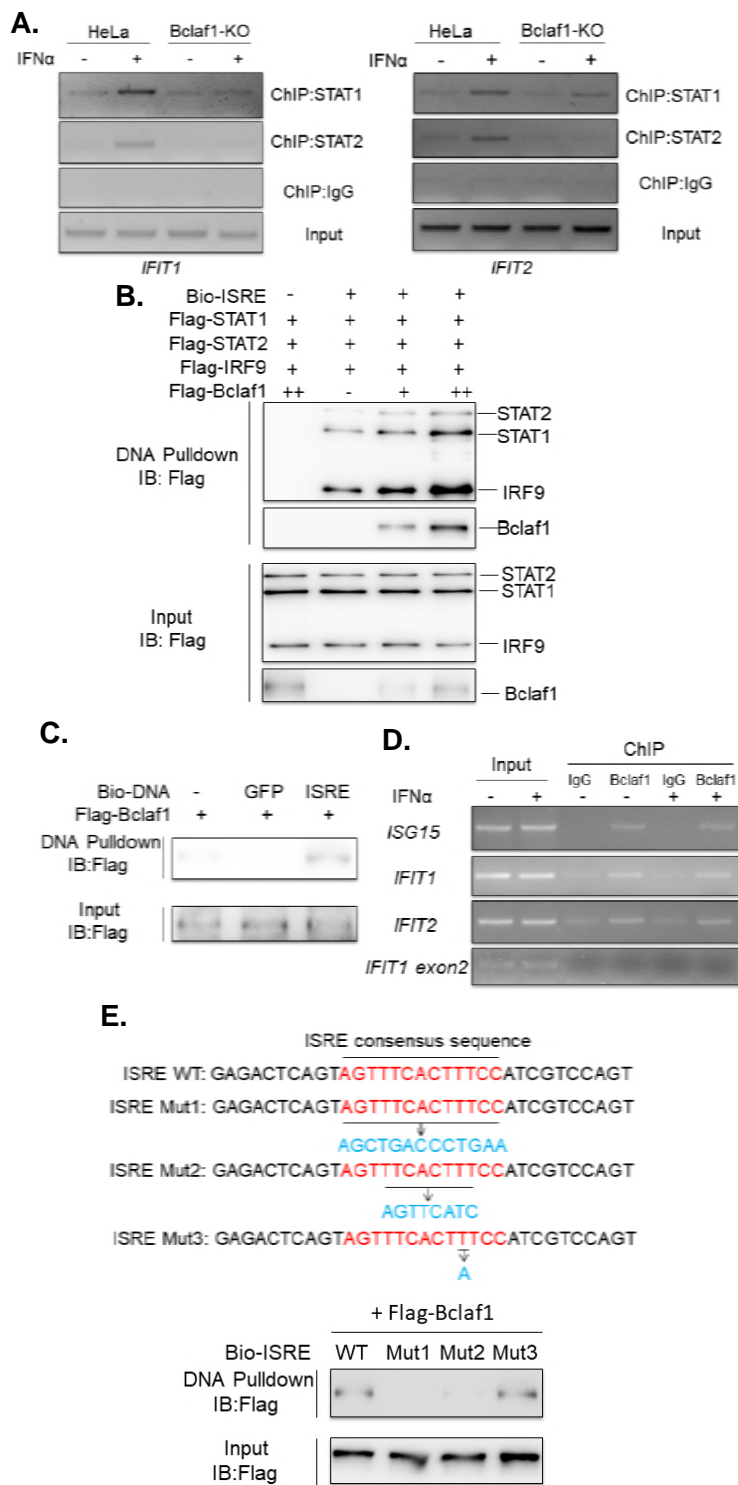



**Figure 6**

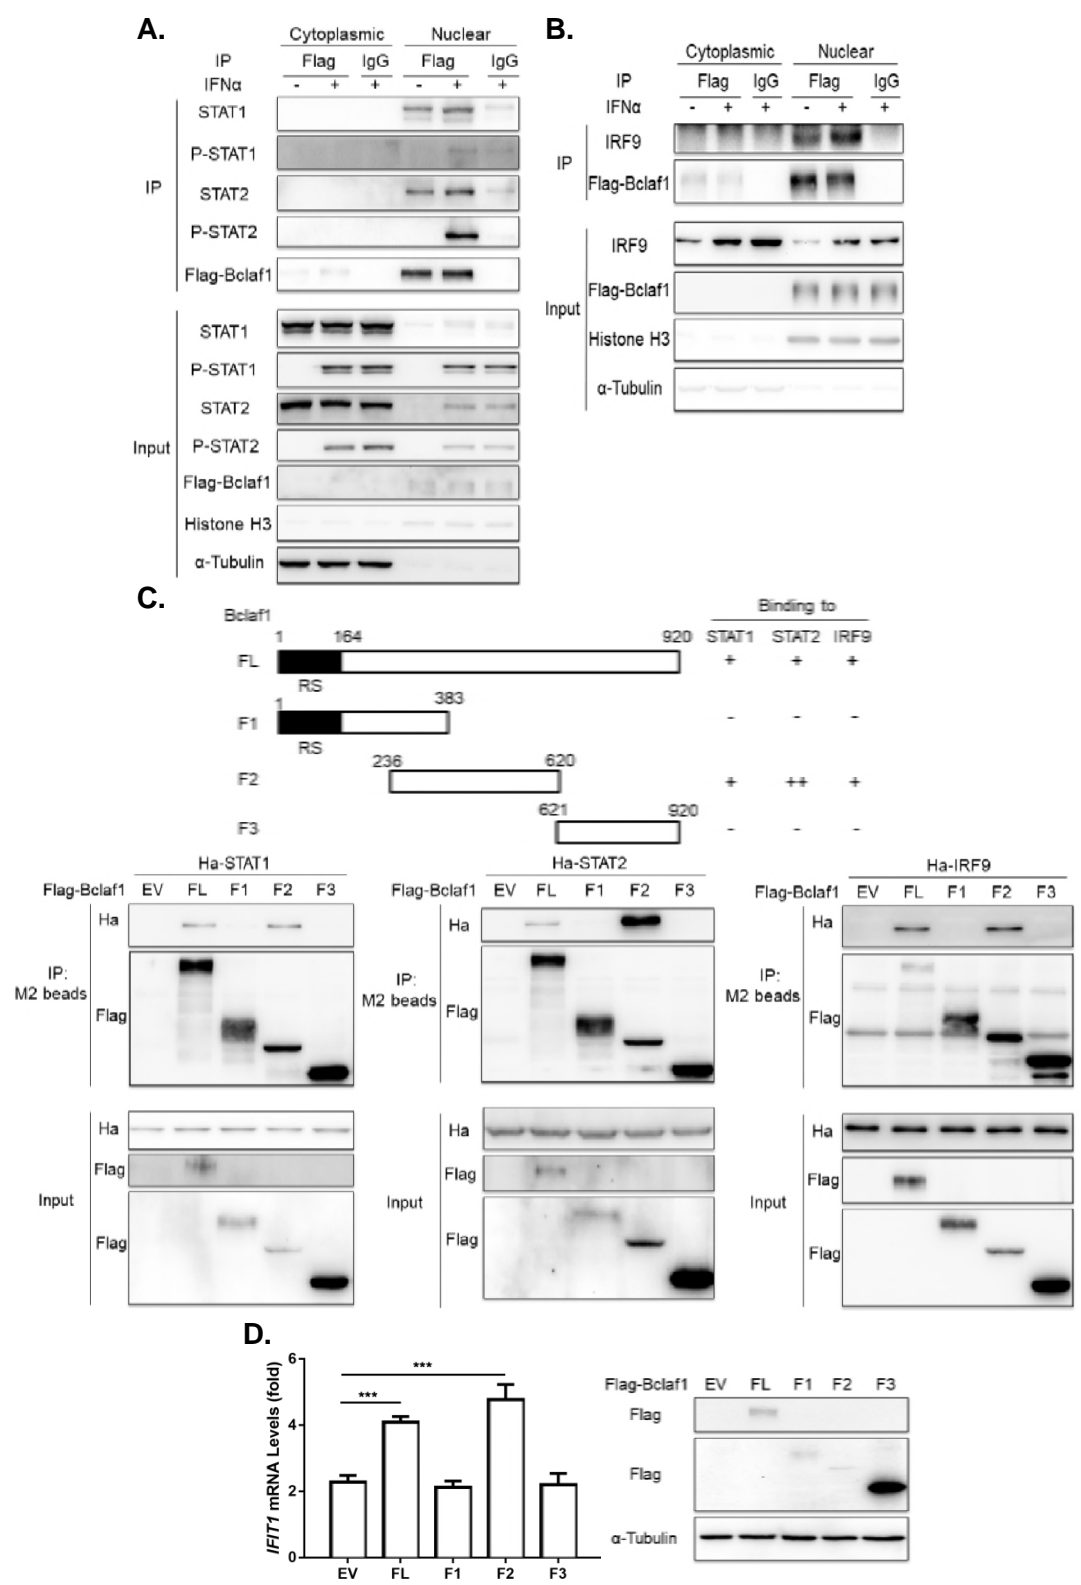

**A.**

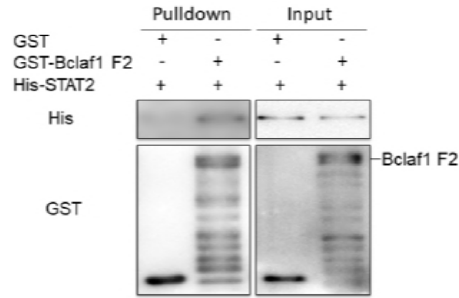

**B.**

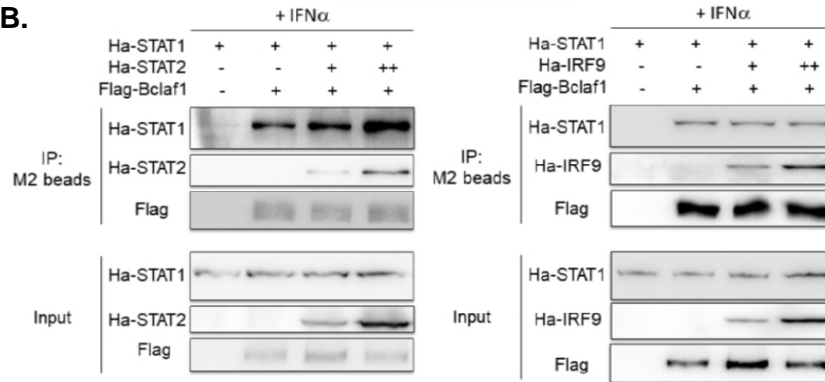

**C.**

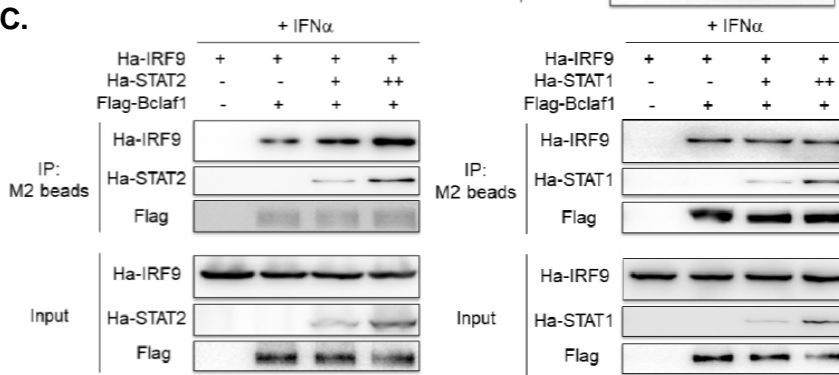

**D.**

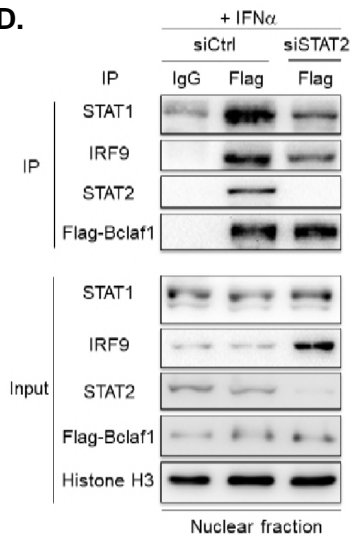

**E.**

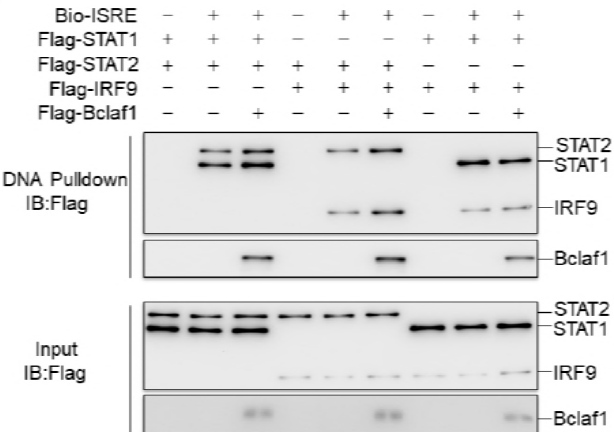

Figure 8

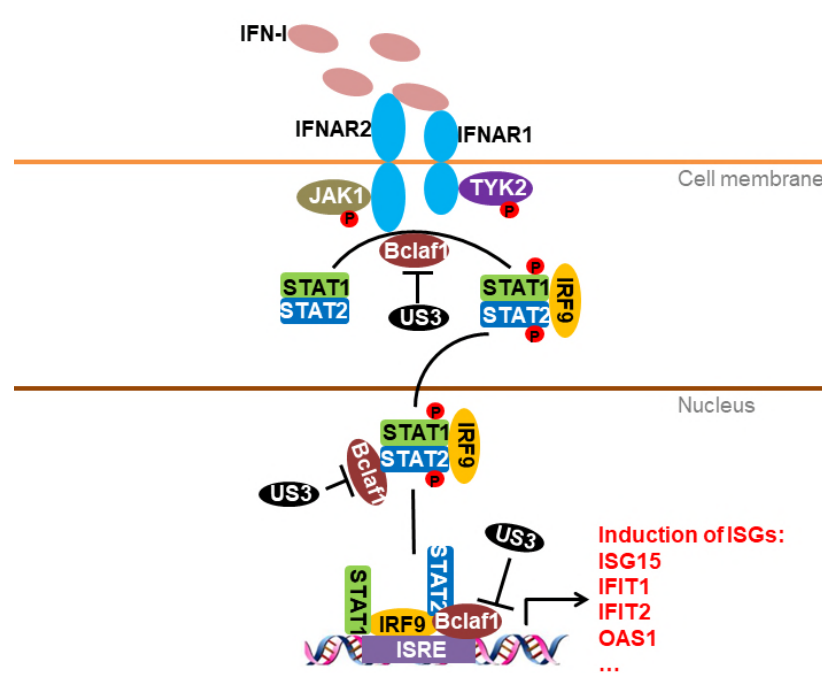

Source: http://biorxiv.org/content/10.1101/392555v1.full.pdf
